# Supplementary material for: Fe(II) spincrossover complex of [1,2,5]thiadiazolo[3,4-f][1,10]phenanthroline
Source: Royal Society of Chemistry journal article supplement (doi:10.1039/b906845g), 2009-01-01
Supplement: b906845g.pdf [file b906845g.pdf]

Supplementary Information

5

**Fe (II) Spincrossover Complex of  
[1,2,5]thiadiazolo[3,4-*f*][1,10]phenanthroline**

Yoshiaki Shuku, Rie Suizu, Kunio Awaga, and Osamu Sato

10

**Table S1** Crystallographic data summary for **1**·CH<sub>2</sub>Cl<sub>2</sub>, and **2**.

|                                                                       | <b>1</b> ·CH <sub>2</sub> Cl <sub>2</sub>                                        | <b>2</b>                                                         |
|-----------------------------------------------------------------------|----------------------------------------------------------------------------------|------------------------------------------------------------------|
| Formula                                                               | C <sub>27</sub> H <sub>14</sub> Cl <sub>2</sub> FeN <sub>10</sub> S <sub>4</sub> | C <sub>38</sub> H <sub>18</sub> FeN <sub>14</sub> S <sub>5</sub> |
| Formula weight                                                        | 733.47                                                                           | 886.80                                                           |
| Temperature / K                                                       | 173                                                                              | 173                                                              |
| Crystal system                                                        | Monoclinic                                                                       | Triclinic                                                        |
| Space group                                                           | <i>P</i> 2 <sub>1</sub> / <i>n</i>                                               | <i>P</i> -1                                                      |
| <i>a</i> / Å                                                          | 11.802(3)                                                                        | 12.174(2)                                                        |
| <i>b</i> / Å                                                          | 18.533(5)                                                                        | 12.264(2)                                                        |
| <i>c</i> / Å                                                          | 13.233(3)                                                                        | 12.350(2)                                                        |
| α / °                                                                 | 90                                                                               | 73.543(4)                                                        |
| β / °                                                                 | 100.485(4)                                                                       | 88.616(7)                                                        |
| γ / °                                                                 | 90                                                                               | 83.507(6)                                                        |
| <i>V</i> / Å <sup>3</sup>                                             | 2846.1(12)                                                                       | 1756.9(5)                                                        |
| <i>Z</i>                                                              | 4                                                                                | 2                                                                |
| D <sub>calc</sub> / g cm <sup>-3</sup>                                | 1.712                                                                            | 1.676                                                            |
| μ(Mo Kα) / cm <sup>-1</sup>                                           | 10.517                                                                           | 7.819                                                            |
| <i>F</i> (000)                                                        | 1480.00                                                                          | 900.00                                                           |
| 2θ <sub>max</sub> / °                                                 | 55.0                                                                             | 55.0                                                             |
| Reflections collected                                                 | 22714                                                                            | 14139                                                            |
| Unique reflections ( <i>R</i> <sub>int</sub> )                        | 6513 (0.145)                                                                     | 7721 (0.073)                                                     |
| Number of parameters                                                  | 398                                                                              | 521                                                              |
| Final <i>R</i> <sub>1</sub> [ <i>I</i> > 2σ( <i>I</i> )] <sup>a</sup> | 0.1194                                                                           | 0.0559                                                           |
| <i>wR</i> <sub>2</sub> <sup>b</sup>                                   | 0.3421                                                                           | 0.1415                                                           |
| Goodness-of-fit                                                       | 1.103                                                                            | 1.074                                                            |

<sup>a</sup>  $R_1 = \frac{\sum ||F_o| - |F_c||}{\sum |F_o|}$ . <sup>b</sup>  $wR_2 = \frac{[\sum \{w(F_o^2 - F_c^2)^2\} / \sum w(F_o^2)^2]^{1/2}}$

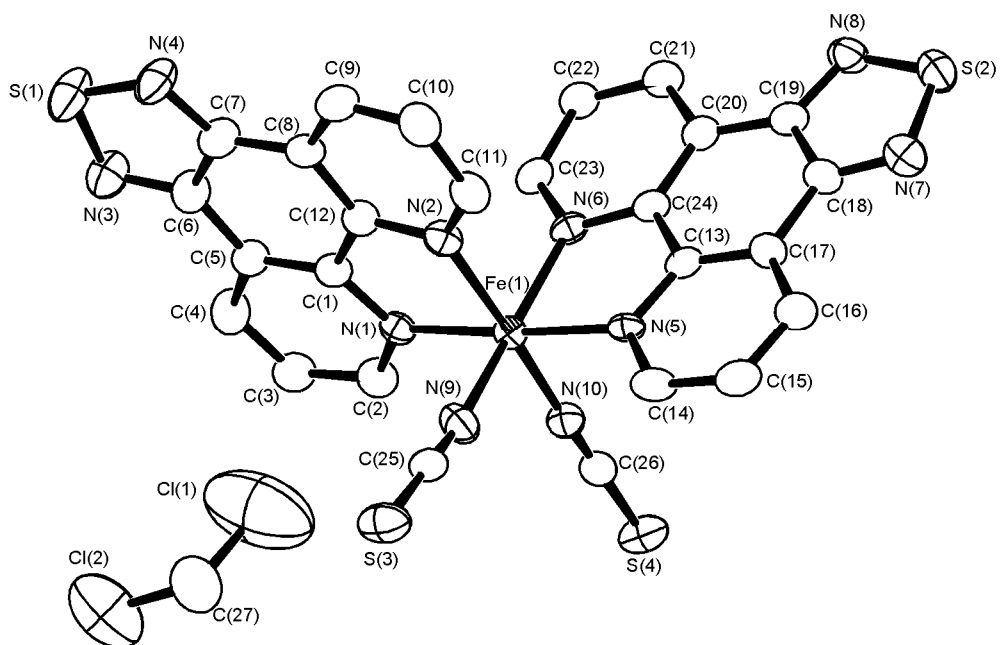

**Fig. S1.** The molecular structure of  $1 \cdot \text{CH}_2\text{Cl}_2$  with displacement ellipsoids at the 50% probability level. Hydrogen atoms were omitted for clarity. The crystalline solvent ( $\text{CH}_2\text{Cl}_2$ ) in  $1 \cdot \text{CH}_2\text{Cl}_2$  is considerably disordered over several positions and assigned tentatively.

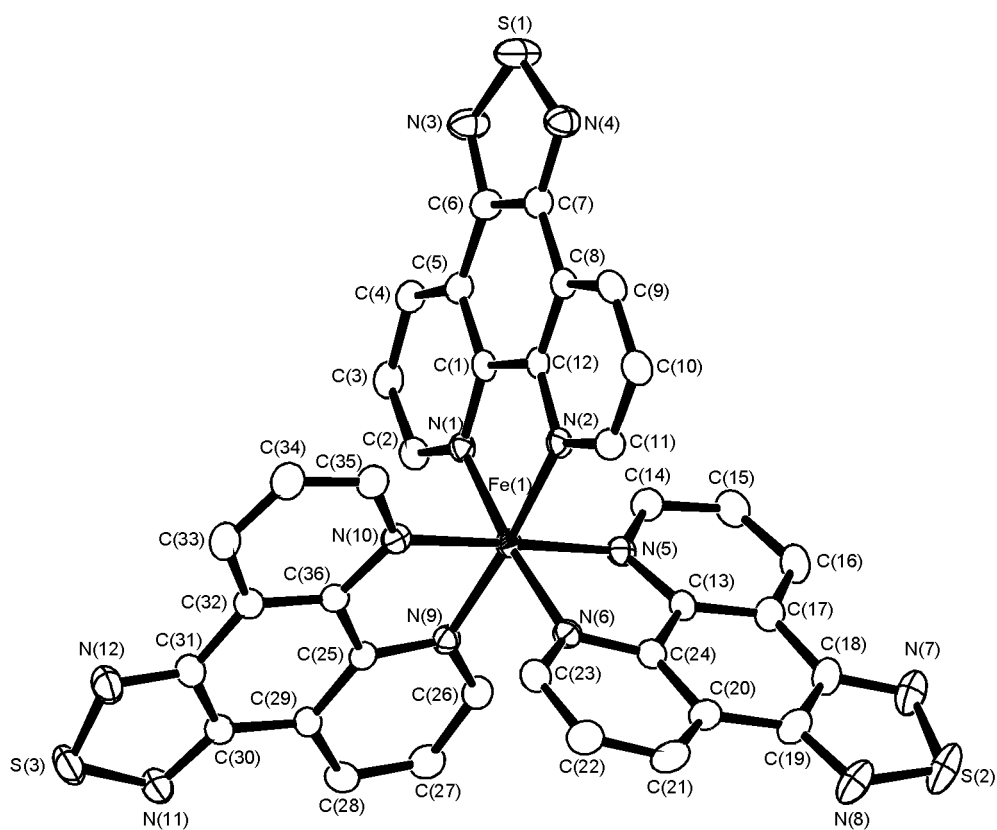

**Fig. S2.** The molecular structure of **3** with displacement ellipsoids at the 50% probability level. Hydrogen atoms and NCS anion were omitted for clarity. Isothiocyanate anion in **3** is disordered two positions with 50:50 occupancy.
